# Supplementary material for: MendeLIMS: a web-based laboratory information management system for clinical genome sequencing
Source: PubMed Central journal article supplement (PMC4155081; doi:10.1186/1471-2105-15-290), 2014-08-27

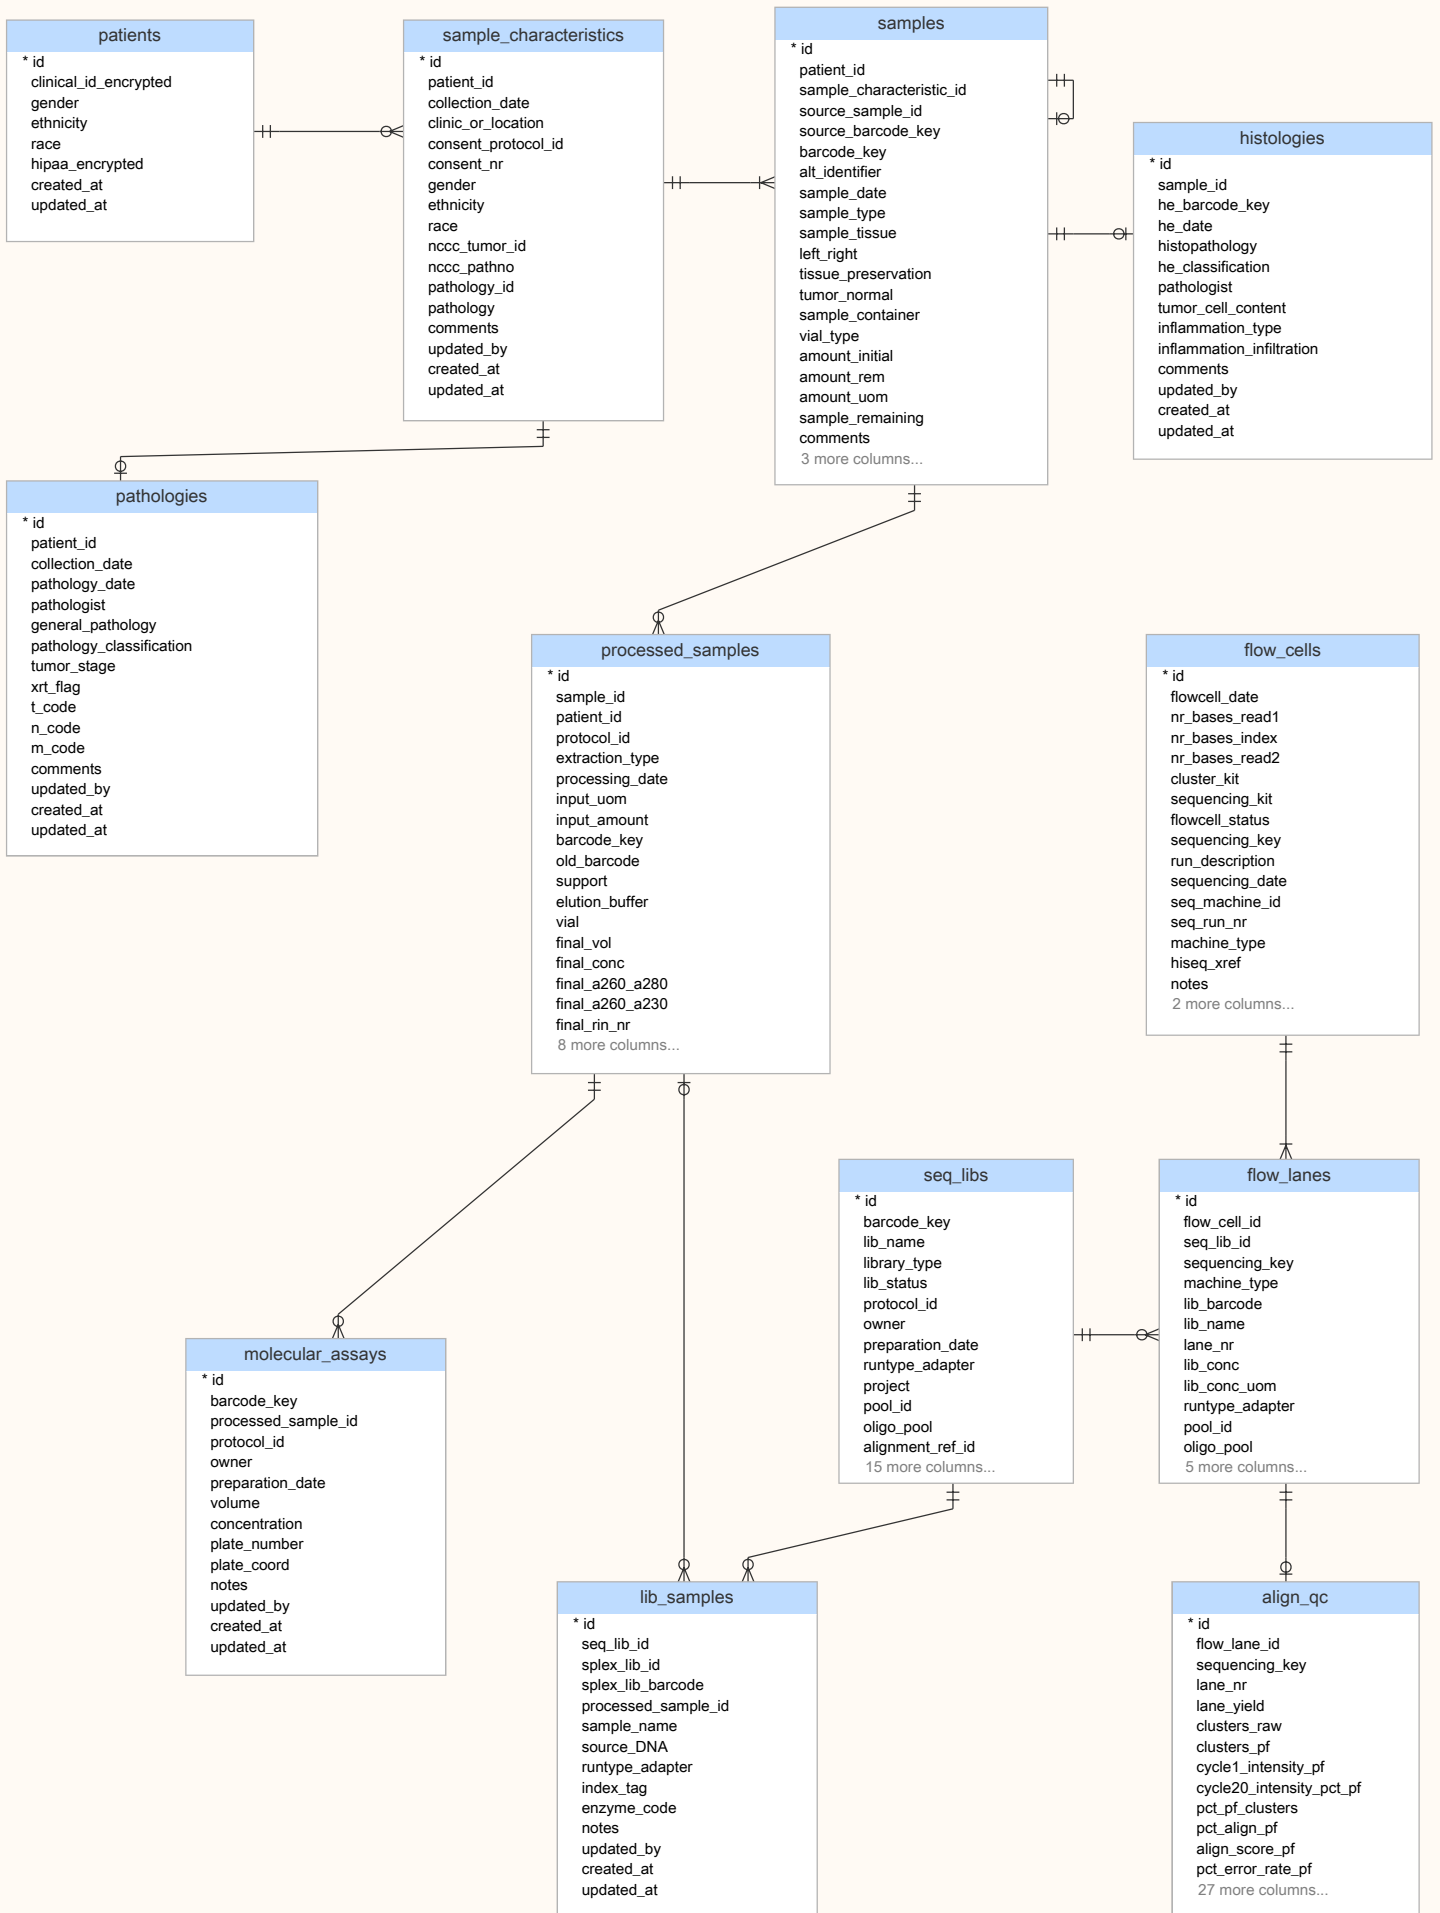

User Tables

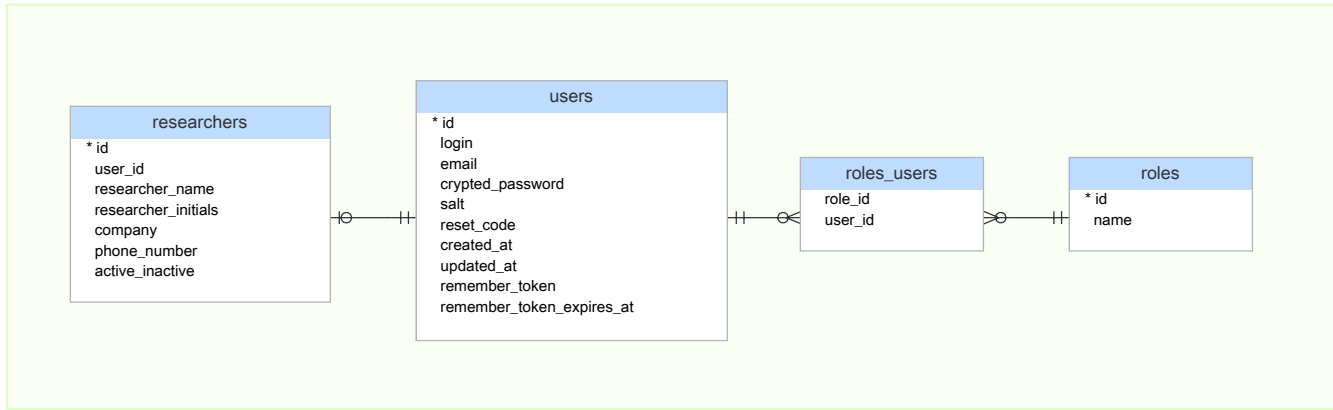

Item ordering

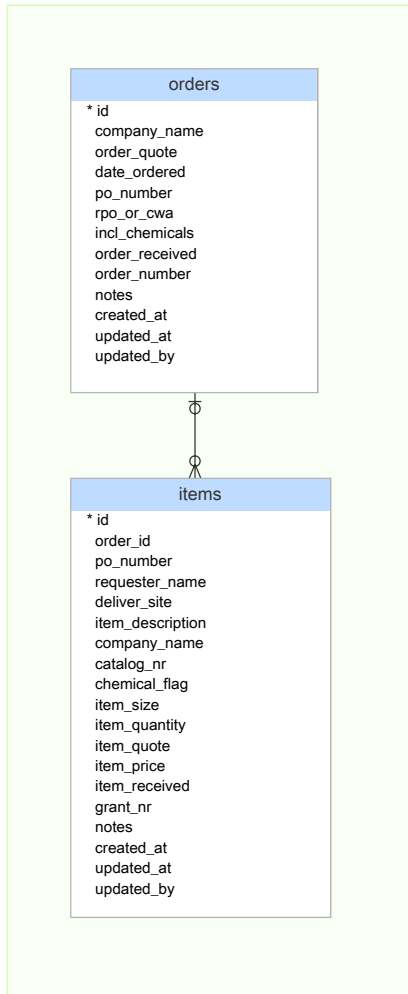

Audit tables

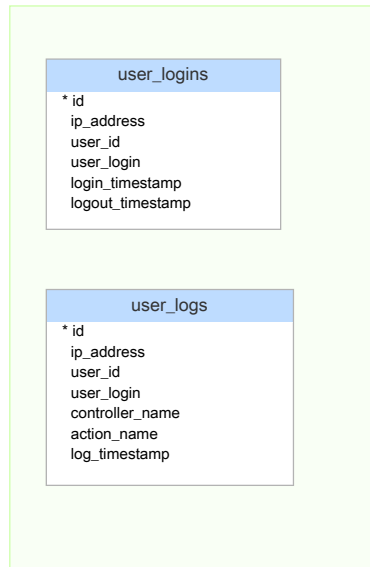

Research Publications

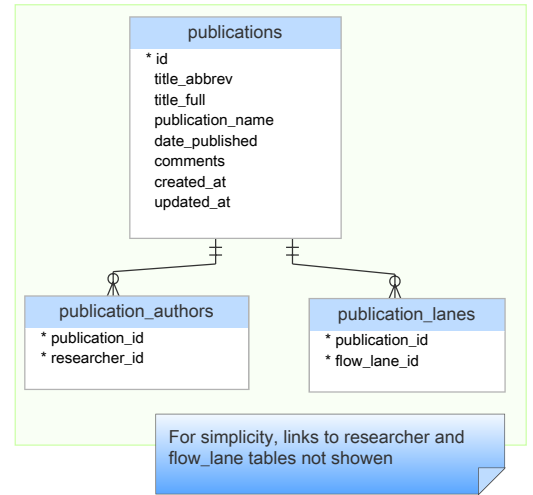

### Sample Storage tables

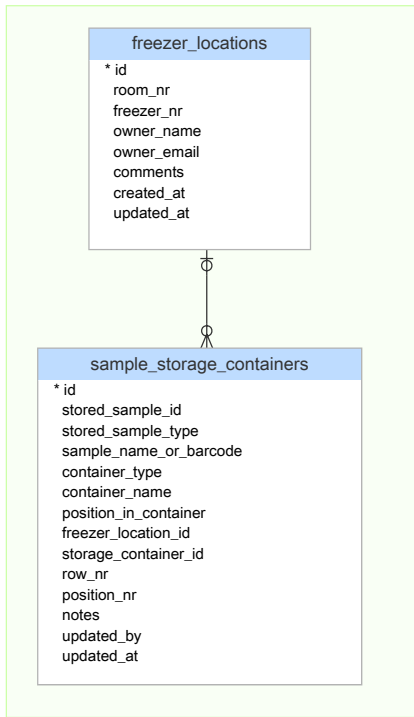

### Sequencing Machines

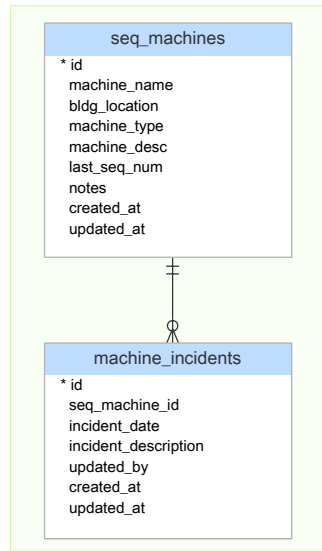

### Sequencing Run data directories

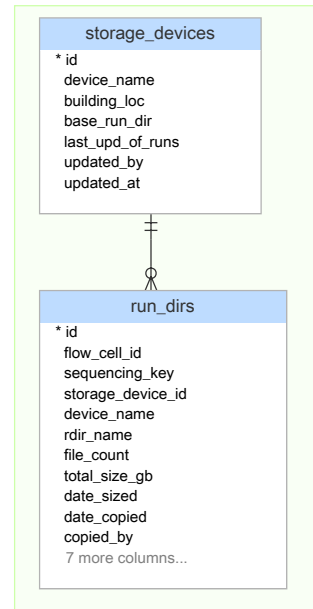

### Configurable Drop-down lists

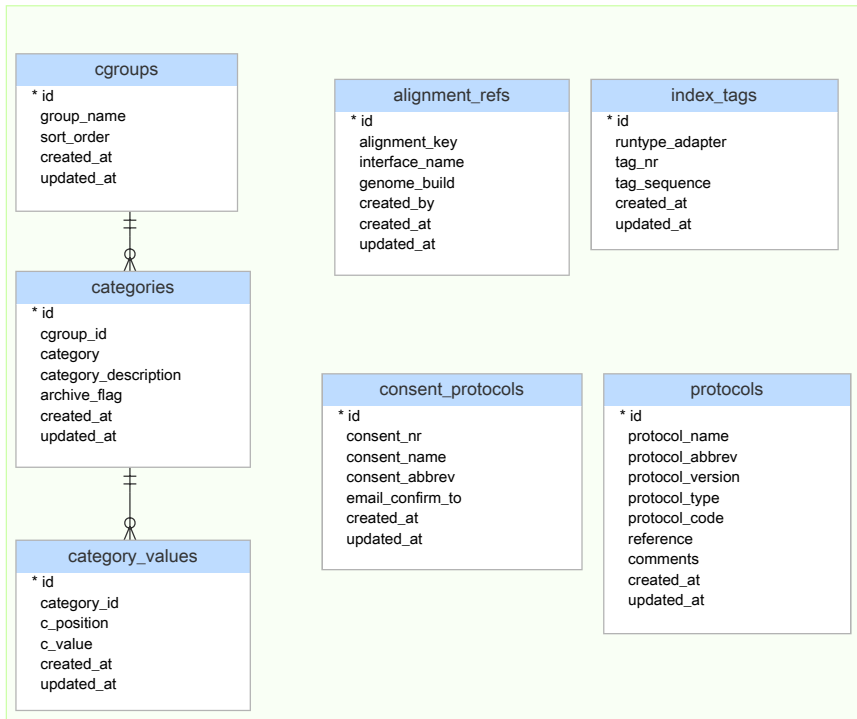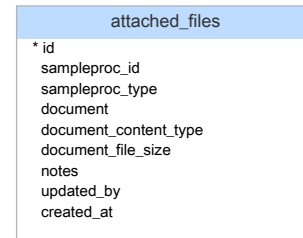

Attached files can be associated with many of main tables - links to additional tables can be easily configured.

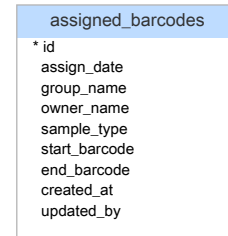

Supplement: 12859_2013_6555_MOESM2_ESM.pdf [file 12859_2013_6555_MOESM2_ESM.pdf]
